# Supplementary material for: Qualitative Study to Explore the Occupational and Reproductive Health Challenges among Women Tobacco Farm Laborers in Mysore District, India
Source: MDPI journal article supplement (doi:10.3390/ijerph21050606), 2024-05-09
Supplement: s1 [file s1]

## Supplemental Material 1 - Interview questions

### A. Demographics

|    | Question                                    | Response                                                                                                                                                                                                                                                                                                |
|----|---------------------------------------------|---------------------------------------------------------------------------------------------------------------------------------------------------------------------------------------------------------------------------------------------------------------------------------------------------------|
| 1. | Age (in years)                              |                                                                                                                                                                                                                                                                                                         |
| 2. | Date of Birth                               |                                                                                                                                                                                                                                                                                                         |
| 3. | Place of Birth, district and State          |                                                                                                                                                                                                                                                                                                         |
| 4. | What is your marital status?                | <div>Single 1</div> <div>Married 2</div> <div>Widow 3</div> <div>Separated/divorced 4</div> <div>Others, specify 5</div> <div>Refused 99</div>                                                                                                                                                          |
| 5. | What religion do you follow?                | <div>Hindu 1</div> <div>Muslim 2</div> <div>Sikh 3</div> <div>Christian 4</div> <div>Jain 5</div> <div>Buddhism 6</div> <div>No religion 7</div> <div>Others (specify) 8</div> <div>No response 9</div> <div>Refused 99</div>                                                                           |
| 6. | Do you belong to particular caste?          | <div>Scheduled Caste 1</div> <div>Scheduled Tribes 2</div> <div>Other Backward Caste 3</div> <div>General Caste 4</div> <div>Refused 99</div>                                                                                                                                                           |
| 7. | Years of Education                          |                                                                                                                                                                                                                                                                                                         |
| 8. | Level of education                          | <div>Professional degree/Post graduate 1</div> <div>Graduate degree 2</div> <div>Secondary school /Intermediary 3</div> <div>High school (class VI to X) 4</div> <div>Primary School (upto Class V) 5</div> <div>*Literate, no formal education 6</div> <div>**Illiterate 7</div> <div>Refused 99</div> |
| 9. | What is your total annual Household income? | Rs. ....                                                                                                                                                                                                                                                                                                |

**B. History of tobacco farming:**

|    | Activity       | Yes | No | How many hours in a day do you work? | How many years do you do this work? |
|----|----------------|-----|----|--------------------------------------|-------------------------------------|
| 1. | Cultivation    |     |    |                                      |                                     |
| 2. | Harvesting     |     |    |                                      |                                     |
| 3. | Curing/ drying |     |    |                                      |                                     |
| 4. | Sorting        |     |    |                                      |                                     |
| 5. | Stacking       |     |    |                                      |                                     |
| 6. | Packing        |     |    |                                      |                                     |

**C. History of tobacco use:**

|                          |                                                                        |                      |                 |                 |        |
|--------------------------|------------------------------------------------------------------------|----------------------|-----------------|-----------------|--------|
| 1.                       | Have you ever used tobacco in any form (Smoking, chewing, snuff, etc)? | Yes<br>No            | 1<br>2          | If no go to Q.9 |        |
| 2.                       | In what forms have you consumed tobacco?                               | Smoking<br>Smokeless | 1<br>2          |                 |        |
| 3.                       | At what age did you first started smoking regularly?                   | ..... in years       |                 |                 |        |
| 4.                       | At what age did you first started using smokeless tobacco regularly?   | ..... in years       |                 |                 |        |
| 5.                       | Do you currently consume tobacco?                                      | Yes<br>No            | 1<br>2          |                 |        |
| 6.                       | Have you consumed tobacco in the last 12 months? (past user)           | Yes<br>No            | 1<br>2          |                 |        |
| 7.                       | Quantity and duration of use (both current and past users)             |                      |                 |                 |        |
| Type of tobacco used     |                                                                        | Frequency per day    | Duration of use | If Quit, since  |        |
|                          |                                                                        |                      |                 | Years           | Months |
| Smoking Tobacco          | Bidi                                                                   |                      |                 |                 |        |
|                          | Cigarette                                                              |                      |                 |                 |        |
|                          | Cigar/Hukka/Chillum/Pipe                                               |                      |                 |                 |        |
| Smokeless Tobacco        | Khaini                                                                 |                      |                 |                 |        |
|                          | Gutka                                                                  |                      |                 |                 |        |
|                          | Chewing tobacco                                                        |                      |                 |                 |        |
|                          | Pan with Zarda                                                         |                      |                 |                 |        |
|                          | Snuff                                                                  |                      |                 |                 |        |
|                          | Oral tobacco – Gul, Kiwam                                              |                      |                 |                 |        |
| Arecanut without tobacco | Pan without zarda                                                      |                      |                 |                 |        |
|                          | Supari                                                                 |                      |                 |                 |        |

|    |                                                                                                                  |                           |             |
|----|------------------------------------------------------------------------------------------------------------------|---------------------------|-------------|
| 8. | Are you exposed to tobacco smoke from others?<br>(e.g. at home, at workplace, while travelling, any other place) | Yes<br>No                 | 1<br>2      |
| 9. | Did you consume tobacco when you were pregnant?                                                                  | Yes<br>No<br>Occasionally | 1<br>2<br>3 |

#### **D. Occupational and reproductive health:**

**Total number of pregnancies: .....**

**History of abortion / miscarriage / death of child:**

- a) Atleast one abortion: Yes / No / Don't know / Refuse
- b) Miscarriage: Yes / No / Don't know / Refuse
- c) Death of child: Yes / No / Don't know / Refuse

|    | Questions                                                                              | Yes | No | Don't know | Refuse to answer |
|----|----------------------------------------------------------------------------------------|-----|----|------------|------------------|
| 1. | Have you ever been involved in tobacco farming when you were pregnant?                 |     |    |            |                  |
| 2. | Have you ever been exposed to tobacco dust when you were pregnant?                     |     |    |            |                  |
| 3. | Do you use protective clothing when handling pesticides during pregnancy?              |     |    |            |                  |
| 4. | Did you develop any allergies during your pregnancy?                                   |     |    |            |                  |
| 5. | Did you develop any allergies after child birth?                                       |     |    |            |                  |
| 6. | Did your child develop any allergies or respiratory problems within 6 months of birth? |     |    |            |                  |
| 7. | Did your child develop any allergies or respiratory problems within 1 year of birth?   |     |    |            |                  |

## Supplemental Material 2

### Focus group discussion question guide based on social ecological model

| Socioecological model | Question                                                                                                               | Prompts                                                            |
|-----------------------|------------------------------------------------------------------------------------------------------------------------|--------------------------------------------------------------------|
| Individual            | How is your health? Do you think you are healthy?                                                                      | How is your reproductive health? (Periods, pregnancy or menopause) |
|                       | How was your pregnancy and child birth?                                                                                | What type of farming work did you do during pregnancy?             |
|                       | Can you talk about the personal protection like gloves, boots, mask use while handling tobacco? When you use these?    | How often do you to get access to these?                           |
|                       | What do you know about the effects of tobacco use during pregnancy and lactation?                                      | What was the source of these information?                          |
|                       | What were the challenges you faced during your periods by working in tobacco farms?                                    |                                                                    |
|                       | What were the challenges you faced during your pregnancy by working in tobacco farms?                                  |                                                                    |
|                       | What type of problems do you think could occur in pregnancy due tobacco use?                                           |                                                                    |
| Interpersonal         | What are your thoughts about tobacco dust and/or smoke around you during pregnancy?                                    |                                                                    |
|                       | What type health problems are there in your family?                                                                    | How often do you go to doctor for this problem?                    |
|                       | What type of support did you receive from you family and friends during pregnancy?                                     | What type of support you wish you had?                             |
| Organisational        | What type of support or services did you receive from your farming organisation during your pregnancy and child birth? | What type of resources you wish you had?                           |
|                       | What type of tobacco cessation programs or recourses are available to you?                                             | What type of resources you think is missing?                       |
| Community             | Can you elaborate on the maternity benefits you received from your community?                                          | What were the challenges in receiving the benefits?                |
| Policy                | To your knowledge, what type of policies or programs are there for women tobacco farmers?                              | What type of policies do you think is required?                    |
| Closing question      | Is there anything else you would like to share with me?                                                                | About your health?<br>About your family and community?             |
